# Supplementary material for: Recovery of Recombinant Avian Paramyxovirus Type-3 Strain Wisconsin by Reverse Genetics and Its Evaluation as a Vaccine Vector for Chickens
Source: MDPI journal article supplement (doi:10.3390/v13020316), 2021-02-19
Supplement: s1 [file s1]

## Supplementary material

|                      |     |                                                   |     |
|----------------------|-----|---------------------------------------------------|-----|
| APMV-1 (avirulent)   | 111 | G-G- <b>R</b> -Q-G- <b>R</b> -L                   | 117 |
| APMV-3 (wisconsin)   | 96  | P- <b>R</b> -P-S-G- <b>R</b> -L                   | 102 |
| APMV-3 (Netherlands) | 101 | A- <b>R</b> -P- <b>R</b> -G- <b>R</b> -L          | 107 |
| APMV-1 (virulent)    | 111 | G- <b>R</b> - <b>R</b> -Q- <b>K</b> - <b>R</b> -F | 117 |

**Figure S1:** F-Prot. cleavage site motif in APMVs: Basic amino acids (R=arginine, K=lysine) are in bold, mentioned numbers indicate amino acids position in the F protein [17].

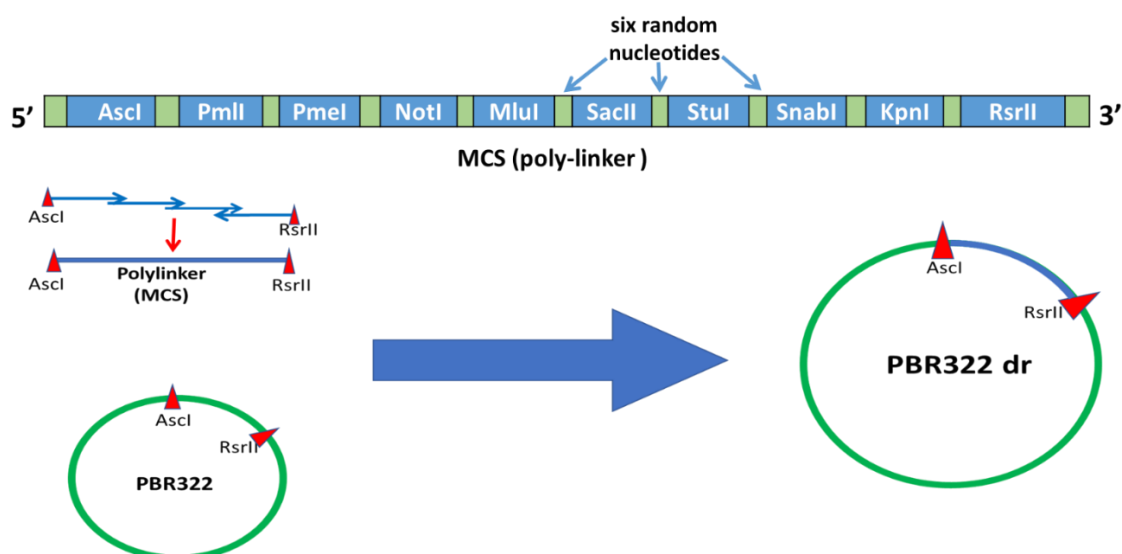

**Figure S2:** Preparation of the cloning plasmid vector PBR322/dr with the polylinker: A 116 nucleotides poly-linker was designed to have the same restriction enzyme sites order used to fragment the whole genome of APM3 strain Wisconsin (restriction enzyme sites were separated by random six-nucleotides). The poly-linker was created by conventional PCR using three forward and one reverse overlapping primers. The resulting gene fragment was cloned into the modified plasmid vector PBR322/dr.

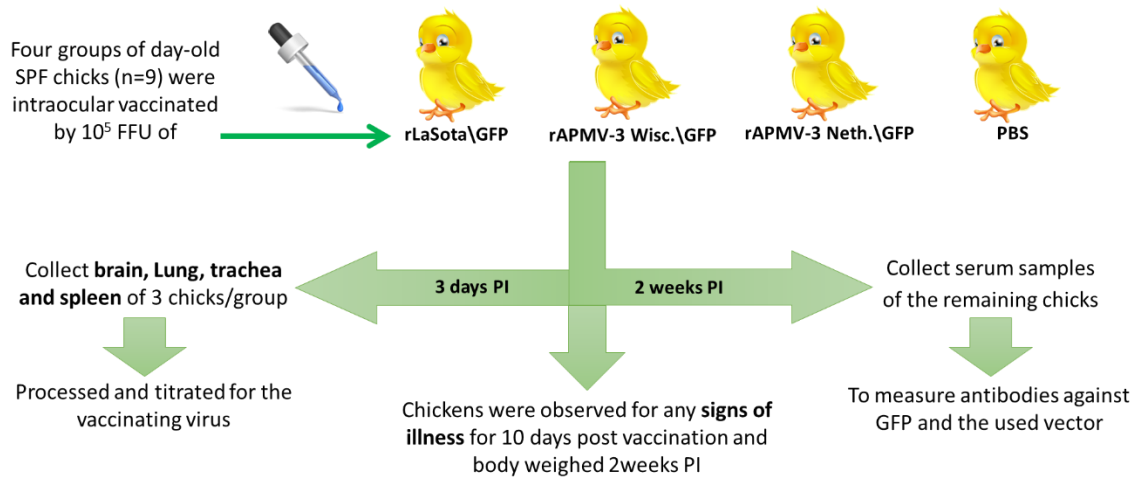

**Figure S3:** Schematic diagram of the in-vivo experiment for evaluation of rAPMV-3 Wisc.\GFP, rAPMV-3 Neth.\GFP and rLasota\GFP as vaccine vectors in chickens.

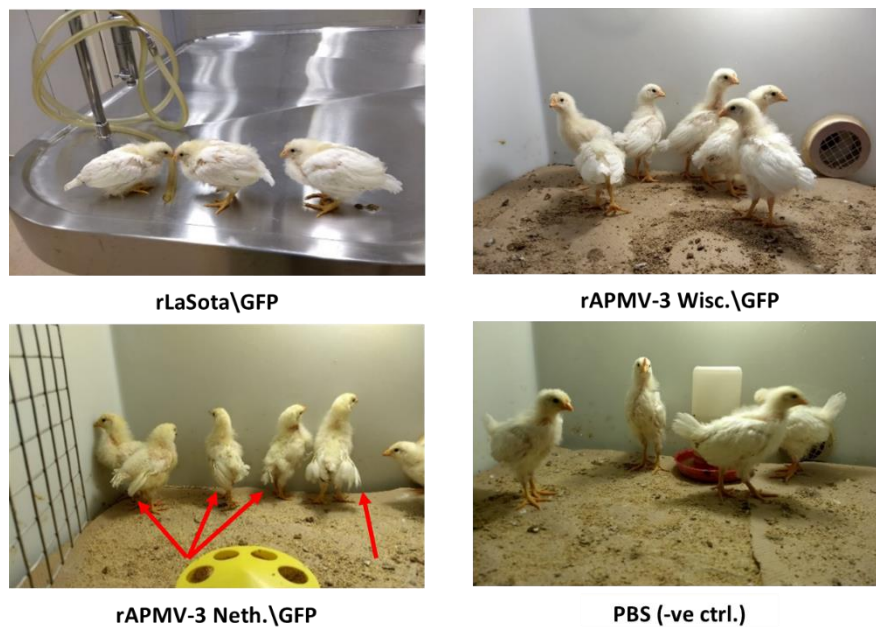

**Figure S4:** Pathological changes observed in vaccinated chicks (two weeks post immunization): Chicks vaccinated by rAPMV-3 Neth.\GFP are showing ruffled-abnormal feathering and stunted growth. Chicks vaccinated by rLaSota\GFP and rAPMV-3 Wisc.\GFP are showing normal body size with no signs of illness. Negative control group was mock vaccinated by PBS .

**Table S1:** Primers used for creation of cDNA sub-genomic fragments

| Subgenomic Fragment | Primer Direction   | Primers (5'-3')                                                                                                                          | Fragment size (Kbp) |
|---------------------|--------------------|------------------------------------------------------------------------------------------------------------------------------------------|---------------------|
| I                   | Forward<br>Reverse | ATT <u>CGGCGCGCCT</u> AATACGACTCACTATAGGGactaaacagaaagttaataagtgttg<br>gtctgc <u>AcGtgggattgggtgctgatgg</u>                              | 1.6 Kbp             |
| II                  | Forward<br>Reverse | caatcca <u>CgTg</u> cagacaggccaccgcctcc<br>gcaatag <u>TtTaaa</u> Caagagagctagatgggttg                                                    | 1.5 Kbp             |
| III                 | Forward<br>Reverse | tctctt <u>GtttAaAc</u> tattgctttataaaaaacc<br>ggtaag <u>GCggcCgc</u> agtgagtgatttattcctg                                                 | 1.4 Kbp             |
| IV                  | Forward<br>Reverse | ctcactgc <u>GgccGC</u> cttaccactagtaacaaattac<br>gggtgtac <u>GCgtgtgt</u> ctcaacatgggactgc                                               | 2.1 Kbp             |
| V                   | Forward<br>Reverse | agacacac <u>GCgt</u> acaccctagtttctagtaaaacc<br>ttatct <u>CcgCgg</u> caaaggtgcaataatcaattc                                               | 2.1 Kbp             |
| VI                  | Forward<br>Reverse | cctttgcc <u>GcgGag</u> ataactaagcatttaag<br>actctt <u>aggcctg</u> ctacagctgcag                                                           | 2.3 Kbp             |
| VII                 | Forward<br>Reverse | tgtagcagg <u>ccta</u> agagtcgcatc<br>gcattata <u>cgtact</u> atttgctc                                                                     | 1 Kbp               |
| VIII                | Forward<br>Reverse | aatagt <u>tacgtata</u> atgcaacc<br>gattacgg <u>taccaa</u> actgagtgtc                                                                     | 2 Kbp               |
| IX                  | Forward<br>Reverse | cagtttgg <u>taccg</u> taatcgtaatac<br>ggtc <u>CGGACCGC</u> GAGGAGGTGGAGATGCCATGCCGACCCactaaacaaaagtata<br>taaatggtttaattaac <sup>+</sup> | 2.3 Kbp             |

**Table S2:** Nucleotide changes involved in pAPMV-3 Wisc.FLC

A

| Subgenomic Fragment |      | Nucleotid number | Original nucleotide                        | Replacement nucleotide | Original sequence      | New sequence    | Introduced RE sites |
|---------------------|------|------------------|--------------------------------------------|------------------------|------------------------|-----------------|---------------------|
| I                   |      | Before (1)       | <u>GGCGCGCCTAATACGACTCACTATAGGG</u>        |                        |                        |                 | AscI + T7 promotor  |
|                     |      | 1590             | A                                          | C                      | caagcg<br>1588-1593    | <u>caCgTg</u>   | PmlI site           |
| II                  |      | 1592             | C                                          | T                      |                        |                 |                     |
|                     |      | 3074             | A                                          | G                      | attttatc<br>3074-3081  | <u>GtttAaAc</u> | PmeI site           |
|                     |      | 3078             | T                                          | A                      |                        |                 |                     |
| III                 |      | 3080             | T                                          | A                      | gccgccag<br>4389-4396  | <u>gcGgccGC</u> | NotI site           |
|                     |      | 4391             | C                                          | G                      |                        |                 |                     |
|                     |      | 4395             | A                                          | G                      |                        |                 |                     |
| IV                  |      | 4396             | G                                          | C                      | accagt<br>6515-6520    | <u>acGCgt</u>   | MluI site           |
|                     |      | 6517             | C                                          | G                      |                        |                 |                     |
| V                   |      | 6518             | A                                          | C                      | ccacgt<br>8575-8580    | <u>ccGcgG</u>   | SacII site          |
|                     |      | 8577             | A                                          | G                      |                        |                 |                     |
| VI                  | VI d | 8580             | T                                          | G                      | aggcct<br>10896 -10901 | <u>aggcct</u>   | StuI site           |
|                     |      |                  | ---                                        | ---                    |                        |                 |                     |
|                     | VI c |                  |                                            |                        | tacgta<br>11916 -11921 | <u>tacgta</u>   | SnaBI site          |
|                     |      |                  | ---                                        | ---                    |                        |                 |                     |
|                     | VI b |                  |                                            |                        | ggtacc<br>13925 -13930 | <u>ggtacc</u>   | KpnI site           |
|                     |      |                  | ---                                        | ---                    |                        |                 |                     |
|                     | VI a | After (16182)    | <u>GGGTCGGCATGGCATCTCCACCTCCTCGCGGTCCG</u> |                        |                        |                 |                     |

B

| Deleted RE site | Original sequence    | Corrected sequence | Changed nucleotide |
|-----------------|----------------------|--------------------|--------------------|
| SacII           | ccgcgg<br>6386-6391  | TcgAgg             | 6358               |
|                 |                      |                    | 6361               |
| RsrII           | cggaccg<br>1291-1297 | cCgATcg            | 1264               |
|                 |                      |                    | 1267               |
| RsrII           | cggaccg<br>2682-2688 | TggCccg            | 2682               |
|                 |                      |                    | 2685               |
